# Supplementary material for: The impact of inclusive architectural strategies on social inclusion characteristics in innovation hubs in Southwest Nigeria
Source: Frontiers journal article supplement (doi:10.3389/fbuil.2025.1632945), 2025-07-30
Supplement: Supplementary_file_1.docx [file Supplementary_file_1.docx]

**APPENDIX II: QUESTIONNAIRE**


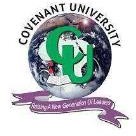


DEPARTMENT OF ARCHITECTURE COLLEGE OF SCIENCE AND TECHNOLOGY COVENANT UNIVERSITY, CANAANLAND,

KM 10, IDI-IROKO ROAD, PMB 1023, OTA, OGUN STATE

**IMPLEMENTATION OF INCLUSIVE ARCHITECTURAL STRATEGIES IN THE DESIGN**

**OF AN INNOVATION HUB IN OGBOMOSO**

Dear Sir/Madam,

This questionnaire is designed to collect information for a master’s dissertation on **Inclusive Architectural Strategies in the Design of an innovation hub, Ogbomoso.** The findings from this study will enable the researcher to evaluate the adoption of inclusive architecture strategies implemented in an innovation hub and how this can enhance building user comfort in the study area. Please respond sincerely, as all information will be treated with strict anonymity and used only for academic purposes.

Thank you so much for your anticipated cooperation.

INSTRUCTIONS: Please tick (√) as appropriate

**SECTION A: SOCIO-DEMOGRAPHIC CHARACTERISTICS OF RESPONDENTS**

1. **Gender**: Male [ ] Female [ ]
2. **Age**: Below 16 years [ ] 16-25 years [ ] 26-35 years [ ] 36-45 years [ ] 46-55 years [ ] 55 Years Above

Oyelude, Felicia Opeyemi

(Researcher)

1. **Marital status:** Single [ ] Engaged [ ] Married [ ] Divorced [ ] Widowed [ ] Separated [ ]
2. **Educational Qualification**: No Formal Education [ ] Primary Education [ ] SSCE [ ] OND/HND [ ] Bachelors [ ] Masters [ ] PhD. [ ]
3. **Do you have any disabilities:** Yes [ ] No [ ] Not Sure [ ]
4. **If yes, please indicate what kind by ticking the appropriate option(s):**

Visual Impairment [ ] Hearing Impairment [ ] Mobility Impairment [ ] Others *(Please Specify)* :

1. **Employment Status:** Student [ ] Employed [ ] Self-employed [ ] Unemployed [ ] Retired [ ]
2. **Innovation Hub:** Oluseun Onigbinde Resource Centre [ ] Co-Creation Hub [ ] Premier Hub Innovation Centre [ ] PDX Innovation Hub [ ] The Dare Adeboye Innovation Hub [ ]

Others (*Please Specify*):

1. **How often do you visit/use this Innovation Hub:** Never [ ] Rarely [ ] Occasionally [ ] Frequently [ ]
2. **Reason for Visit:** I work here [ ] To make use of the centre [ ]

**SECTION B: ADEQUACY OF INCLUSIVE ARCHITECTURE STRATEGIES**

*Please tick (√) as appropriate to rate on a scale of 1 to 5, where* ***1 – Strongly Inadequate****,* ***2 –Inadequate****,* ***3 – Neutral, 4 – Adequate, 5 – Strongly Adequate,*** *indicate how much you agree with the following statements below.*

| **Inclusive Architecture Strategies** | | **Strongly Inadequate [1]** | **Inadequate**  **[2]** | **Neutral**  **[3]** | **Adequate**  **[4]** | **Strongly Adequate**  **[5]** |
| --- | --- | --- | --- | --- | --- | --- |
| **Category 1: Exterior/Outdoor Area** | | | | | | |
| 11. | The parking area is clear and free from obstruction. |  |  |  |  |  |
| 12. | Parking is located close to the entrance. |  |  |  |  |  |
| 13. | Parking areas are equipped with zebra crossings for safety. |  |  |  |  |  |
| 14. | Paths leading to the building are straight and clear. |  |  |  |  |  |
| 15. | The walkways and paths are well-lit. |  |  |  |  |  |
| **Category 2: Circulation and Wayfinding** | | | | | | |
| 16. | Stairs have handrails on both sides |  |  |  |  |  |
| 17. | The main stairs are centrally located in the building. |  |  |  |  |  |
| 18. | Ramps are equipped with handrails on both sides. |  |  |  |  |  |
| 19. | The ramps are easy to climb |  |  |  |  |  |
| 20. | There is sufficient space for movement inside the building. |  |  |  |  |  |
| 21. | Navigation within the building is straightforward. |  |  |  |  |  |
| 22. | Furniture arrangement allows for ease of movement. |  |  |  |  |  |
| **Category 3:** **Building Interior/ Interior Facilities** | | | | | | |
| 23. | Doors within the building are wide enough for easy access. |  |  |  |  |  |
| 24. | All areas within the innovation hub are accessible to everyone. |  |  |  |  |  |
| 25. | Related functional areas are located near each other. |  |  |  |  |  |
| **Category 4:** **Access Arrangements/Entrance** | | | | | | |
| 26. | Multiple entry and exit points are available in the building. |  |  |  |  |  |
| 27. | The building’s entrance is easy to locate. |  |  |  |  |  |
| 28. | The entrance is conveniently near the reception area. |  |  |  |  |  |
| 29. | The reception is on the same level as the entrance. |  |  |  |  |  |
| **Category 5:** **Sensory Considerations** | | | | | | |
| 30. | The building environment is not noisy. |  |  |  |  |  |
| 31. | Lighting inside the building is comfortable for the eyes. |  |  |  |  |  |
| **Category 6:** **Materials and colour** | | | | | | |
| 32. | The stairs are non-slippery. |  |  |  |  |  |
| 33. | Floors are not reflective or glossy. |  |  |  |  |  |
| 34. | The walls and floors have distinguishable colours. |  |  |  |  |  |
| 35. | Different materials are used for walls and floors for clarity. |  |  |  |  |  |
| 36. | The ground surfaces are smooth. |  |  |  |  |  |
| **Category 7****: Information Accessibility** | | | | | | |
| 37. | Signs within the building are clear and easy to read. |  |  |  |  |  |
| 38. | Assistive technologies are available for diverse needs. |  |  |  |  |  |
| **Category 8:** **Adaptability and Flexibility of Space** | | | | | | |
| 39. | Spaces are designed for multiple functions. |  |  |  |  |  |
| 40. | Furniture can be rearranged easily for different purposes. |  |  |  |  |  |

**SECTION C: SOCIAL INCLUSION CHARACTERISTICS IN THE INNOVATION HUB**

*Please tick (√) as appropriate to rate on a scale of 1 to 5, where* ***1 – Strongly Inadequate****,* ***2 –Inadequate****,* ***3 – Neutral, 4 – Adequate, 5 – Strongly Adequate,*** *indicate how much you agree with the following statements below.*

| **Social inclusion characteristics** | | **Strongly Inadequate**  **[1]** | **Inadequate**  **[2]** | **Neutral**  **[3]** | **Adequate**  **[4]** | **Strongly Adequate**  **[5]** |
| --- | --- | --- | --- | --- | --- | --- |
| 41. | The hub includes spaces for interaction and collaboration. |  |  |  |  |  |
| 42. | Activities are organized to encourage participation from diverse user groups. |  |  |  |  |  |
| 43. | The hub fosters a sense of belonging and acceptance. |  |  |  |  |  |
| 44. | Assess the extent to which sports and recreational facilities are accessible to all users. |  |  |  |  |  |
